# Supplementary material for: CD69 Signaling in Eosinophils Induces IL-10 Production and Apoptosis via the Erk1/2 and JNK Pathways, Respectively
Source: MDPI journal article supplement (doi:10.3390/biom14030360), 2024-03-18
Supplement: s1 [file s1]

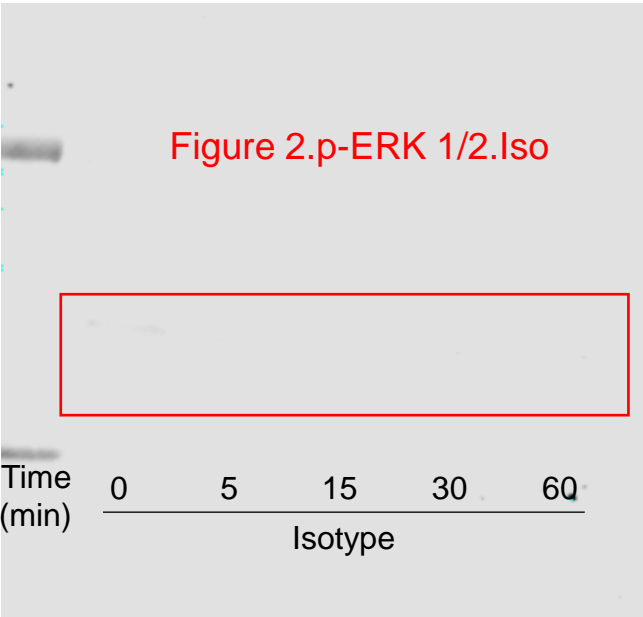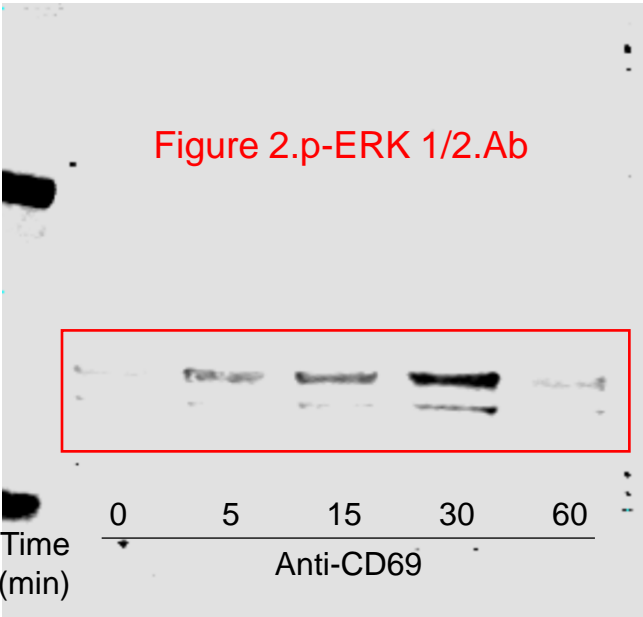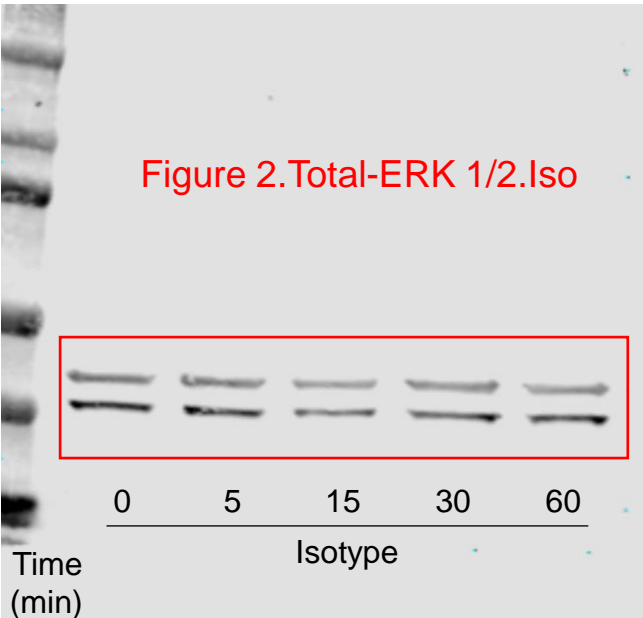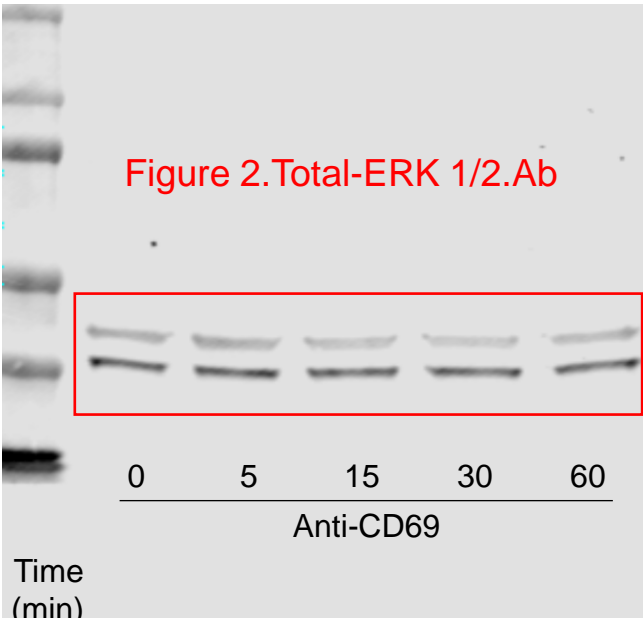

Figure 2.Western blot raw

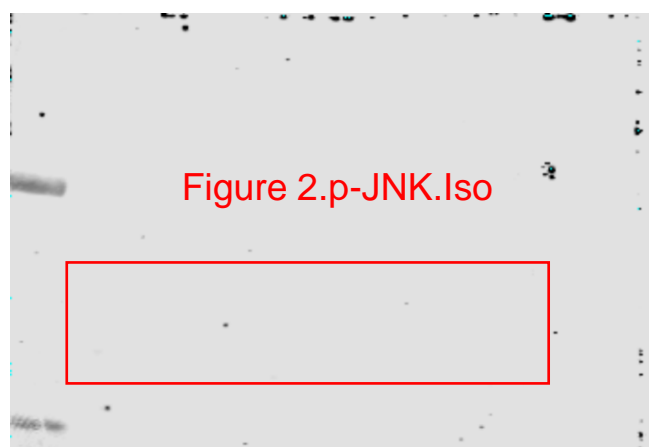

Time (min) 0 5 15 30 60  
Isotype

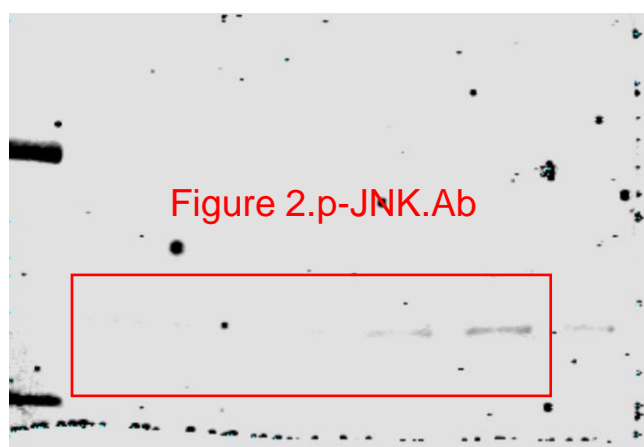

Time (min) 0 5 15 30 60  
Anti-CD69

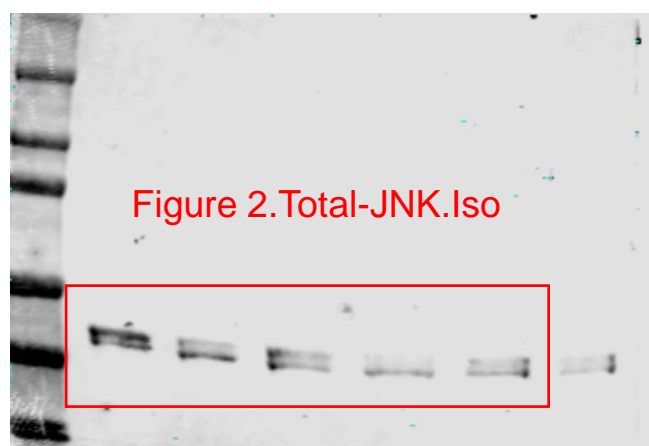

Time (min) 0 5 15 30 60  
Isotype

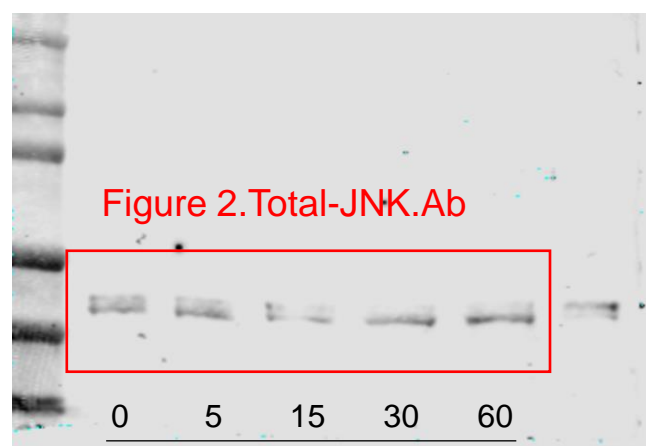

Time (min) 0 5 15 30 60  
Anti-CD69

Figure 2.Western blot raw

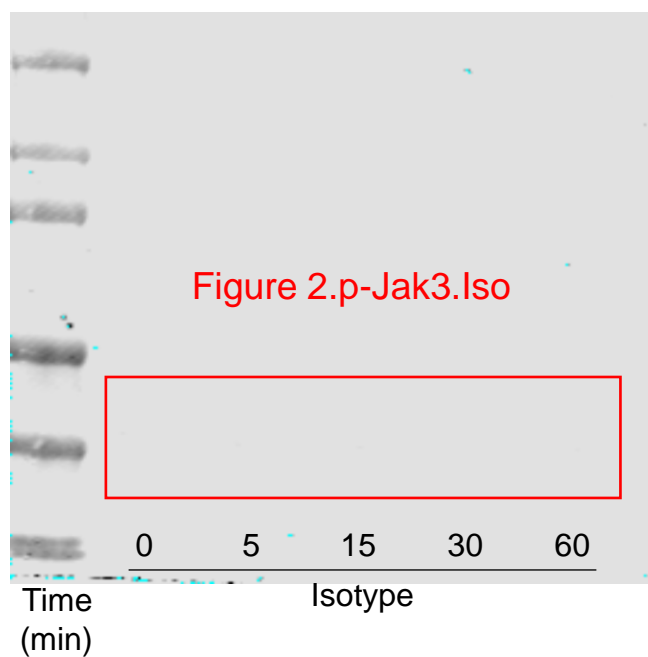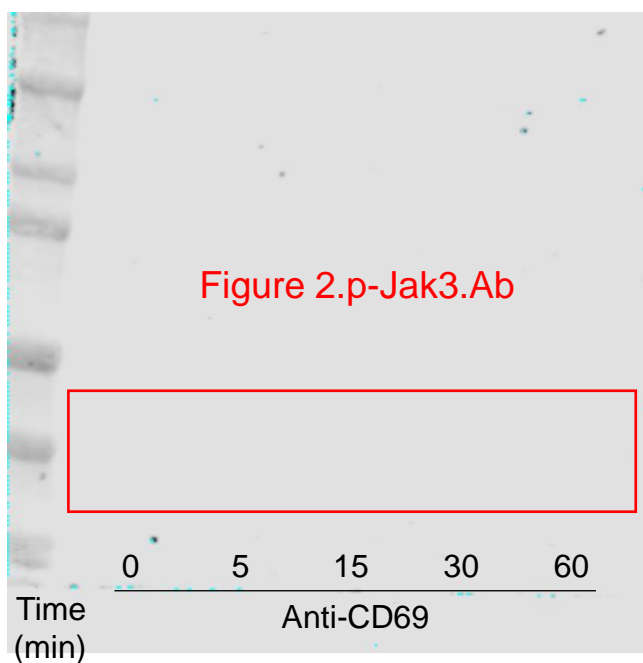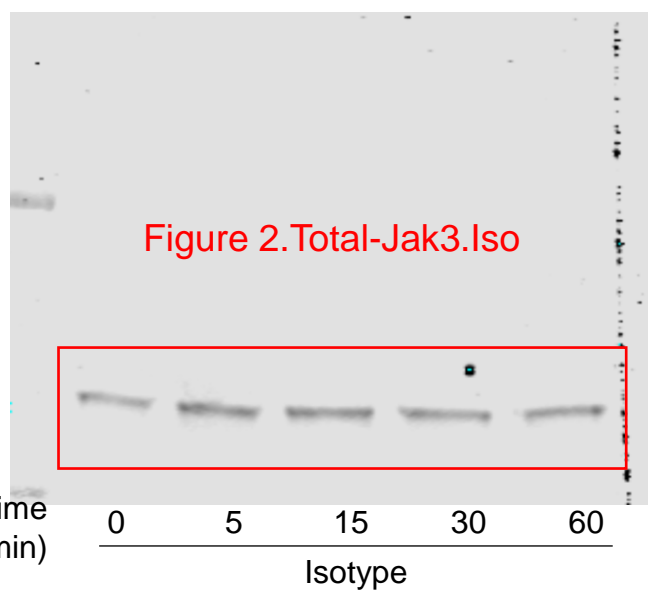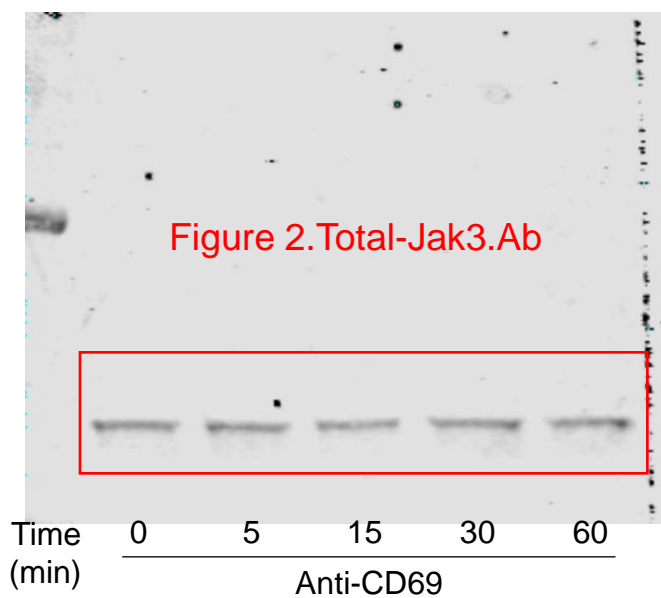

Figure 2.Western blot raw

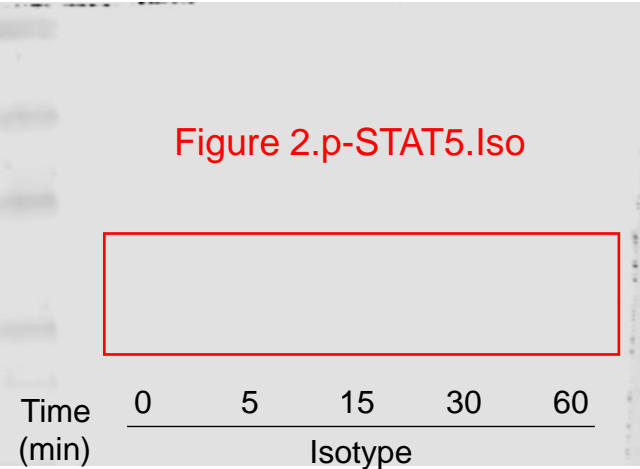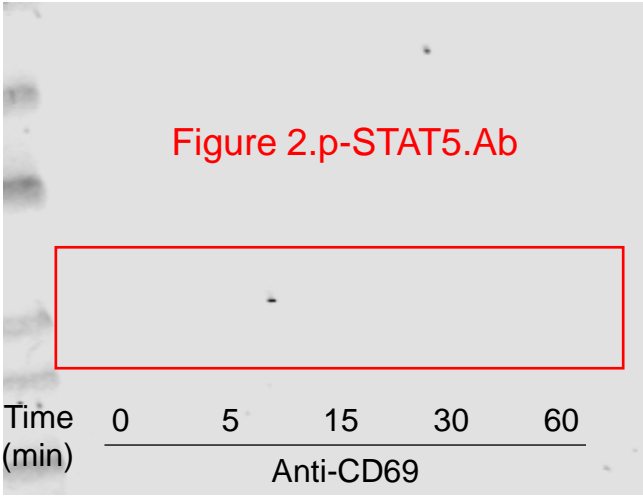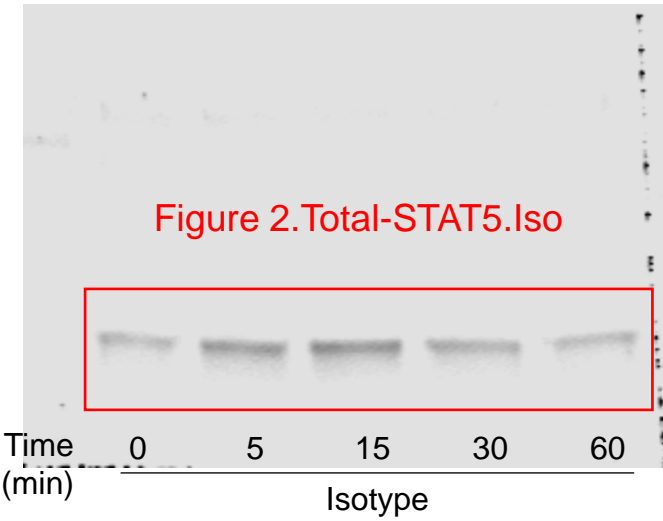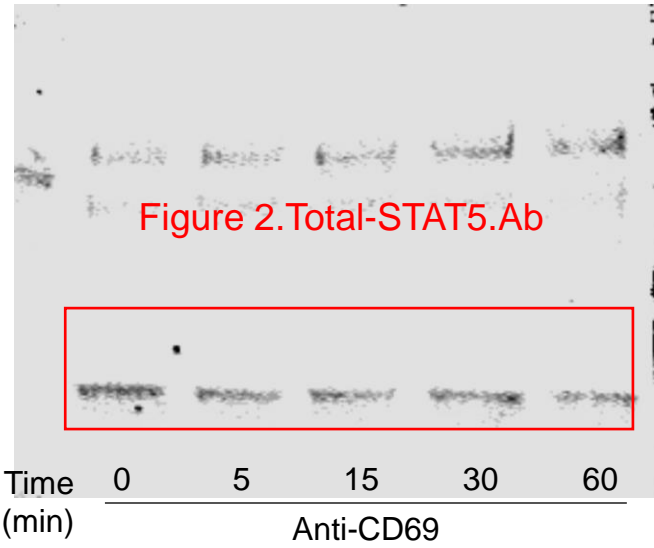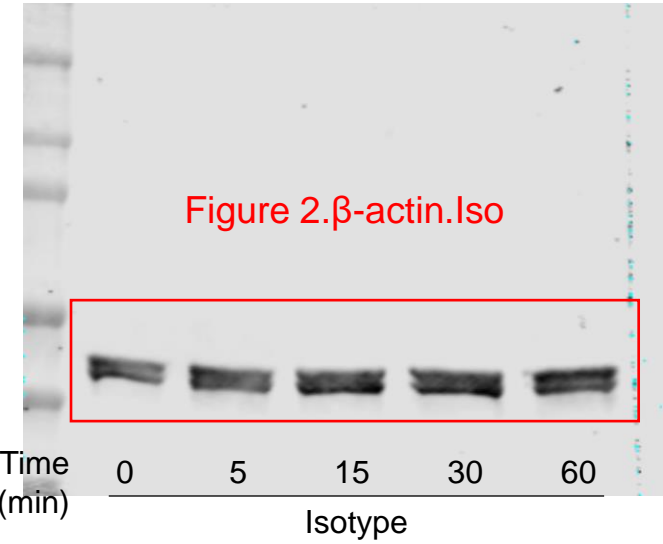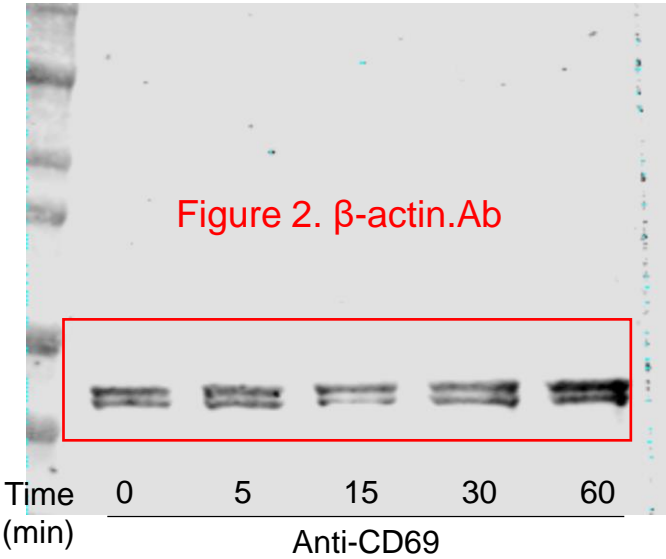

Figure 2.Western blot raw

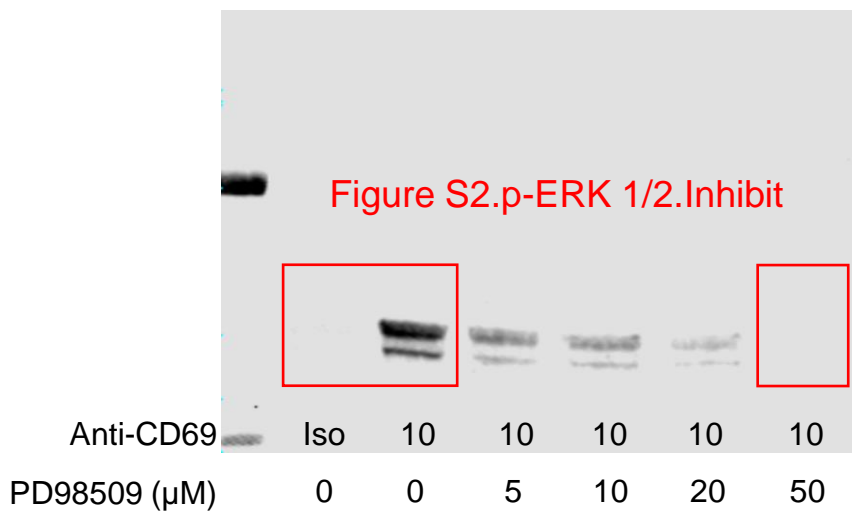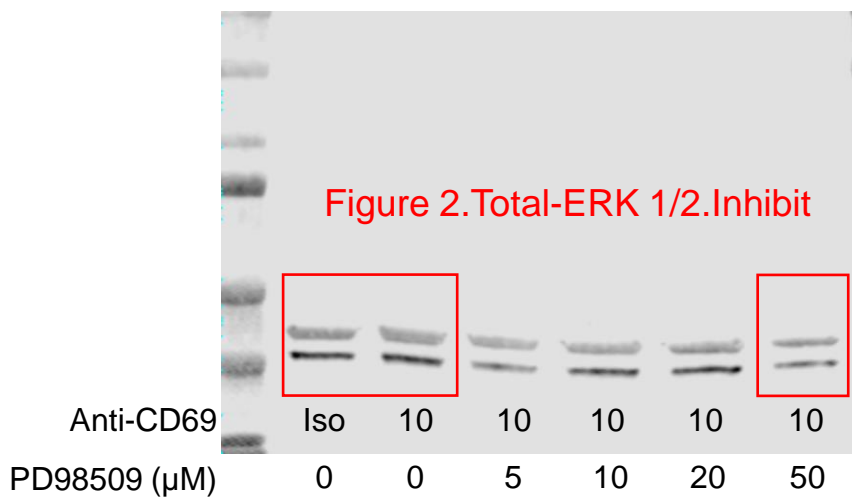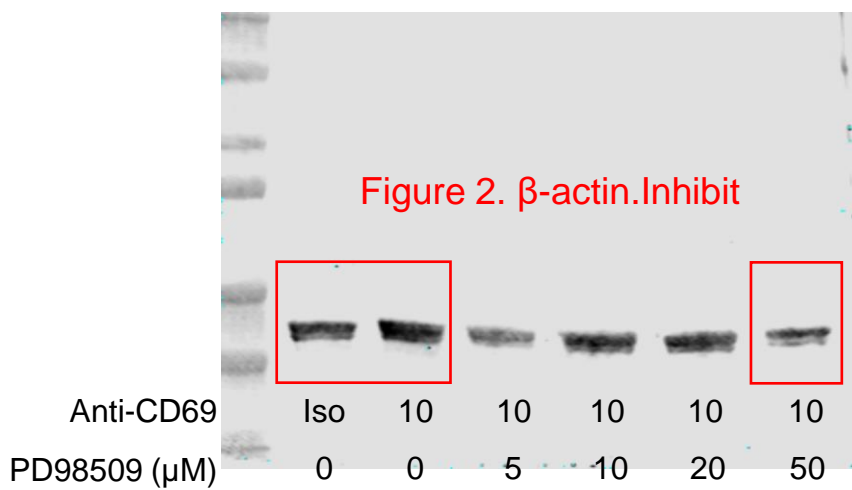

Figure S2.Western blot raw
